# Supplementary material for: Natura 2000 Network vs. Tourism and Investment Potential of Communes—A Case Study of Czarnkowsko-Trzcianecki County
Source: MDPI journal article supplement (doi:10.3390/su132111668), 2021-10-22
Supplement: s1 [file s1]

**Table S1.** Divisions within which diagnostic variables and their weights and character

| Division                                                                       | Feature                                                                                                       | Symbol | Unit of measurement        | Weight | Character <sup>1</sup> |
|--------------------------------------------------------------------------------|---------------------------------------------------------------------------------------------------------------|--------|----------------------------|--------|------------------------|
| tourism assets<br>[TA]                                                         | forest area                                                                                                   | TA1    | ha                         | 0.15   | +                      |
|                                                                                | meadow and pasture area                                                                                       | TA2    | ha                         | 0.04   | +                      |
|                                                                                | other land and wasteland                                                                                      | TA3    | ha                         | 0.08   | +                      |
|                                                                                | protected areas                                                                                               | TA4    | ha                         | 0.12   | +                      |
|                                                                                | river                                                                                                         | TA5    | number                     | 0.08   | +                      |
|                                                                                | lake                                                                                                          | TA6    | number                     | 0.08   | +                      |
|                                                                                | fairs, exhibitions and events                                                                                 | TA7    | number                     | 0.08   | +                      |
|                                                                                | museums                                                                                                       | TA8    | number                     | 0.05   | +                      |
|                                                                                | churches                                                                                                      | TA9    | number                     | 0.06   | +                      |
|                                                                                | palace and castles                                                                                            | TA10   | number                     | 0.09   | +                      |
|                                                                                | historic monuments                                                                                            | TA11   | number                     | 0.09   | +                      |
|                                                                                | length of walking trails                                                                                      | TA12   | km                         | 0.03   | +                      |
|                                                                                | length of bicycle trails                                                                                      | TA13   | km                         | 0.03   | +                      |
|                                                                                | length of water trails                                                                                        | TA14   | km                         | 0.01   | +                      |
|                                                                                | length of horse trails                                                                                        | TA15   | km                         | 0.01   | +                      |
| state and<br>protection<br>of the<br>environment<br>[EP]                       | wastewater treatment plant capacity relative to volume of wastewater to be treated                            | EP1    | %                          | 0.25   | +                      |
|                                                                                | amount of waste generated during the year                                                                     | EP2    | t                          | 0.25   | -                      |
|                                                                                | water consumption for the needs of the national economy and population during the year                        | EP3    | hm <sup>3</sup>            | 0.25   | -                      |
|                                                                                | number of home sewage treatment plants                                                                        | EP4    | number                     | 0.25   | +                      |
| transport<br>accessibility<br>[TRA]                                            | length of regional roads                                                                                      | TRA1   | km                         | 0.40   | +                      |
|                                                                                | length of county roads                                                                                        | TRA2   | km                         | 0.40   | +                      |
|                                                                                | length of bicycle path                                                                                        | TRA3   | km                         | 0.20   | +                      |
| hotels, eating<br>establishments<br>and<br>supplementary<br>facilities<br>[HC] | hotels                                                                                                        | HC1    | number of facilities       | 0.30   | +                      |
|                                                                                | boarding houses                                                                                               | HC2    | number of facilities       | 0.25   | +                      |
|                                                                                | restaurants and cafés                                                                                         | HC3    | number of facilities       | 0.25   | +                      |
|                                                                                | swimming pools                                                                                                | HC4    | number of facilities       | 0.04   | +                      |
|                                                                                | swimming areas                                                                                                | HC5    | number of facilities       | 0.05   | +                      |
|                                                                                | sports fields                                                                                                 | HC6    | number of facilities       | 0.06   | +                      |
|                                                                                | horse riding centres, studs                                                                                   | HC7    | number of facilities       | 0.05   | +                      |
| service<br>infrastructure<br>[SI]                                              | petrol stations                                                                                               | SI1    | number of facilities       | 0.30   | +                      |
|                                                                                | pharmacies                                                                                                    | SI2    | number of facilities       | 0.08   | +                      |
|                                                                                | banks and money exchange offices                                                                              | SI3    | number of facilities       | 0.20   | +                      |
|                                                                                | post and telecommunication centres                                                                            | SI4    | number of facilities       | 0.30   | +                      |
|                                                                                | outpatient clinics and health centres                                                                         | SI5    | number of facilities       | 0.06   | +                      |
|                                                                                | shops and markets                                                                                             | SI6    | number of facilities       | 0.06   | +                      |
| technical<br>infrastructure<br>[TI]                                            | proportion of residential buildings connected to the water network in total residential buildings             | TI1    | %                          | 0.20   | +                      |
|                                                                                | water distribution network length                                                                             | TI2    | km per 100 km <sup>2</sup> | 0.20   | +                      |
|                                                                                | proportion of residential buildings connected to the sanitary drainage network in total residential buildings | TI3    | %                          | 0.20   | +                      |
|                                                                                | sanitary drainage network length                                                                              | TI4    | km per 100 km <sup>2</sup> | 0.20   | +                      |
|                                                                                | population using gas supply network                                                                           | TI5    | %                          | 0.20   | +                      |

|                                 |                                                                                         |     |                                         |      |   |
|---------------------------------|-----------------------------------------------------------------------------------------|-----|-----------------------------------------|------|---|
| population<br>relations<br>[PR] | total number of inhabitants                                                             | PR1 | number of people                        | 0.15 | + |
|                                 | total number of employed people                                                         | PR2 | number of people                        | 0.20 | + |
|                                 | the proportion of unemployed in number of<br>inhabitants in working age                 | PR3 | %                                       | 0.30 | + |
|                                 | population density                                                                      | PR4 | number of people<br>per km <sup>2</sup> | 0.35 | + |
| commune<br>finances<br>[CF]     | commune incomes                                                                         | CF1 | PLN                                     | 0.40 | + |
|                                 | total value of signed grant agreements                                                  | CF2 | PLN                                     | 0.10 |   |
|                                 | proportion of grants and subsidies in total<br>income of the commune                    | CF3 | %                                       | 0.10 | + |
|                                 | the proportion of expenditure on public<br>roads in total expenditure of commune        | CF4 | %                                       | 0.20 | + |
|                                 | the proportion of expenditure on tourism and<br>culture in total expenditure of commune | CF5 | PLN                                     | 0.20 | + |

'+' designates stimulants; '-' designates inhibitors
